# Supplementary material for: Does the landscape functionality approach provide insight into rangeland conditions in the Tanqua Karoo region, South Africa?
Source: PeerJ. 2022 May 19;10:e13305. doi: 10.7717/peerj.13305 (PMC9124461; doi:10.7717/peerj.13305)
Supplement: Supplemental Information 1 [file peerj-10-13305-s001.xlsx]

## Sheet: All
Site no.	Vegetation type	Start elevation	Slope	Direction	Total patch length	Total patch width	Total patch area	No of patches/10 m	Patch area index	Landscape organisation index	Average interpatch length	Stability	Infiltration	Nutrients	No plant/hectare	Mean distance/b/plants	Canopy volume(m3/hectare)	Years of reservation	Degradation level
1	TES	776	12	340	66.13	8871.47	100.88	10	0.1	0.66	0.34	62.1	30.2	21.2	21746	0.68	3764	5	1
2	TES	783	28	300	41.73	6201	63.85	4.9	0.06	0.42	1.17	51	23.9	15.8	5605	1.34	2930	5	1
3	TES	718	19	300	56.1	9231	100.47	7.1	0.1	0.56	0.61	55	29.5	19.5	9609	1.02	1923	5	2
4	TWR	476	0	275	26.68	3442	28.57	5.8	0.03	0.27	1.21	49.3	28.6	13.2	11239	0.94	315	5	3
5	TWR	499	3	268	20.98	2763	12.12	7.2	0.01	0.21	1.08	50.9	30.6	13	9328	1.04	724	10	2
6	TWR	519	12	350	28.52	3384	14.19	10.3	0.01	0.29	0.69	51.3	28.2	18.6	12153	0.91	145	5	3
7	TES	610	8	310	38.63	6213	32.54	10.5	0.03	0.41	0.57	53.9	26.1	18.7	20890	0.69	846	5	3
8	TES	610	7	265	42.09	5516	31.24	12.4	0.04	0.52	0.39	56.7	30.9	18.9	16421	0.78	549	5	3
9	TES	603	6		35.21	4859	29.36	13.2	0.04	0.46	0.41	56.5	27.3	16.1	18695	0.73	1512	5	2
10	TES	643	11	300	55.61	8660	77.75	11	0.09	0.61	0.35	65	32.4	23	17613	0.75	3233	5	1
11	TES	676	13	110	65	9384	104.46	8.5	0.1	0.65	0.41	61	33.3	24.9	8786	1.07	3606	5	1
12	TWR	534	7	230	47.05	7201	64.97	9.1	0.06	0.47	0.58	60.8	38.1	31.8	18255	0.74	1237	5	1
13	TWR	518	2	229	32.84	4883	30.09	6.4	0.03	0.33	1.03	57.3	26	15.9	17324	0.76	808	5	2
14	TWR	515	1	230	26.26	3922	20.08	6.7	0.02	0.26	1.08	54.3	26	16.6	17825	0.75	250	5	3
15	TWR	717	4	205	34.02	4310	50.04	3.8	0.05	0.34	1.69	61.5	27.2	17.9	7550	1.15	1259	5	1
16	TES	916	19	195	58.64	9527	81.35	12	0.1	0.71	0.25	59.9	32.9	26.8	15317	0.808	2725	5	1
17	TES	806	22	300	43.99	7918	83.91	7.5	0.08	0.44	0.74	54.9	29	18	5853	1.31	2637	5	1
18	TES	998	40	190	66.56	12378	137.61	9.1	0.14	0.67	0.37	62	33.8	28.1	9801	1.01	4927	5	1
19	TES	938	8		63.9	6957	43.97	12.6	0.06	0.55	0.36	54.8	29.7	20.6	19270	0.72	1341	5	2
20	TES	1149	12	10	43.09	6116	34.61	12.1	0.04	0.52	0.4	56.3	27.7	16.1	29059	0.59	1978	5	2
21	TWR	560	1	255	27.73	4093	23.84	6.7	0.02	0.28	0.77	53.2	23.8	13.9	6419	1.25	278	10	3
22	TK	582	1	35	23.6	3677	20.33	6.1	0.02	0.24	1.23	43.5	26.4	14.7	8898	1.06	272	10	1
23	TWR	603	3	95	47.46	6589	48.07	9.6	0.05	0.47	0.55	62.2	30.9	24.9	20191	0.7	1486	10	1
24	TWR	561	1	268	42.32	7577	48.21	9	0.05	0.42	0.64	67.4	30.2	25.4	15176	0.81	818	10	2
25	TWR	486	1	120	27.69	4657	33.14	7.3	0.03	0.28	0.99	52.7	41	24.6	21722	0.68	1547	5	1
26	TK	463	0	195	4.53	510	0.41	8.5	0	0.05	1.1	46.3	25.8	10.5	53460	0.43	12	5	3
27	TWR	402	1	315	3.82	930	3.07	1.6	0	0.04	5.66	51.8	20.3	10.1	1471	2.61	73	10	3
28	TK	407	1	356	1.85	264	0.53	3	0	0.02	3.17	44.6	21.8	12.9	4598	1.47	5	10	3
29	TK	398	1	355	3.97	654	2.09	1.9	0	0.04	4.8	48.6	26.5	11.9	1482	2.6	101	10	2
30	TK	371	0	300	2	312	0.25	3.7	0	0.02	2.58	58.3	21.7	10.4	352	5.33	2	30	3
31	TK	389	1	350	5.8	1153	2.93	2.9	0	0.06	3.25	44.6	32.9	11.9	1259	2.82	91	10	2
32	TK	393	2	348	3.04	423	0.77	2.5	0	0.03	3.73	54.1	22.8	9.4	1326	2.75	13	30	3
33	TK	345	0	295	17.76	936	4.61	2.8	0	0.18	2.84	59.4	33.4	26.7	1559	2.53	40	30	3
34	TK	338	0	265	4.18	864	2.47	1.9	0	0.04	4.79	56.9	27.7	17.9	613	4.04	15	30	3
35	TK	372	1	310	5.34	527	0.59	5.8	0	0.05	1.58	47.1	31.6	18.8	34662	0.54	18	30	3
36	TK	427	0	170	12.2	1817	7.26	4	0.01	0.12	2.14	39.7	27.7	16.5	3499	1.69	137	30	2
37	TK	408	1	270	15.25	1453	8.76	4.1	0.01	0.15	2.02	49.2	22	9.5	9709	1.01	211	10	1
38	TWR	416	2	60	32.86	4264	150.89	1.9	0.15	0.33	3.36	49.7	19.2	10.2	2022	2.22	285	10	3
39	TWR	428	1	240	24.08	3484	55.42	2.1	0.06	0.24	3.62	50.6	21.7	8.9	2612	1.96	620	10	2
40	TWR	442	2	110	33.4	4426	56.39	3.9	0.06	0.34	1.61	52.4	25.3	14.4	3623	1.66	325	10	3
41	TK	426	4	150	12.65	1640	10.33	2.6	0.01	0.13	3.24	57.3	20.8	15.2	3168	1.78	192	5	1
42	TK	409	4	150	2.73	283	0.64	2.2	0	0.03	4.23	62.9	19	11.9	263	6.17	8	5	3
43	TK	446	4	300	2.78	382	0.95	1.7	0	0.03	5.4	59	27.6	18.9	1267	2.81	31	5	3
